# Supplementary material for: Anti‐Inflammatory Effect of 1,3,5,7‐Tetrahydroxy‐8‐isoprenylxanthone Isolated from Twigs of Garcinia esculenta on Stimulated Macrophage
Source: Hindawi journal article supplement (doi:10.1155/2015/350564), 2015-01-01

Supplementary data :

Figure 1 Full bolt figure of MAPK pathways effected by TIE

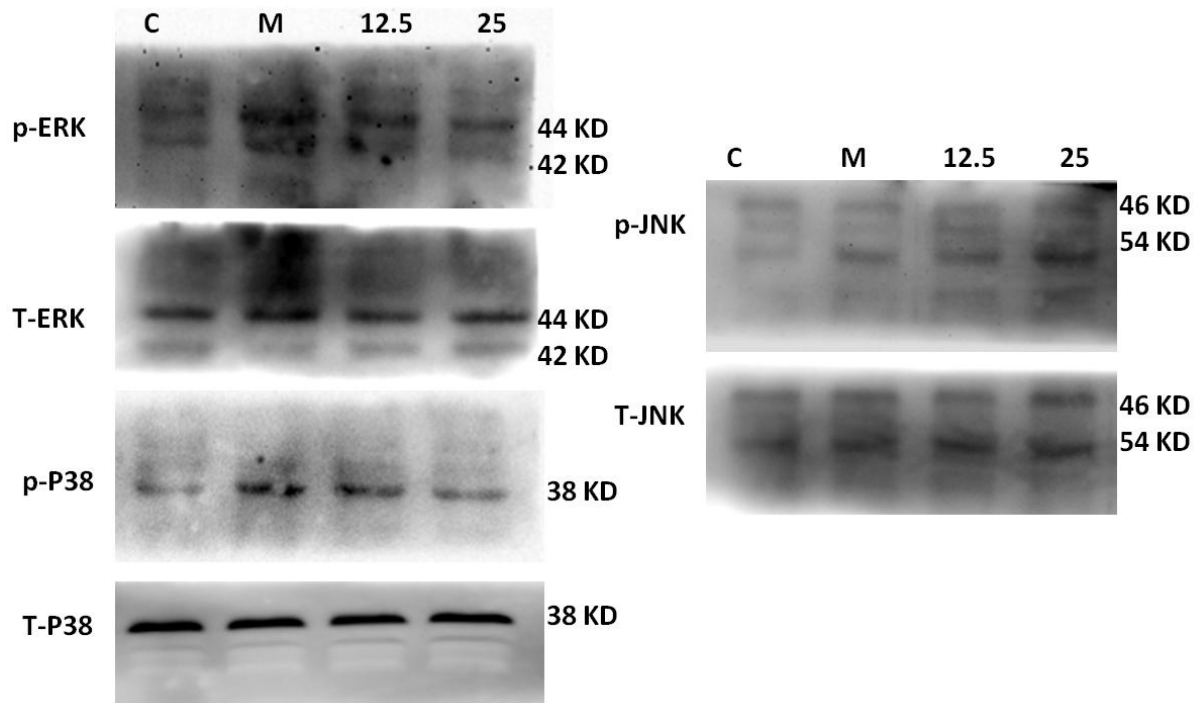

Supplement: f1 [file 350564.f1.pdf]
